# Supplementary material
Source: publisher site journal article supplement (https://www.dovepress.com/article/281422)
Supplement: Supplementary file 1 [file get_supplementary_file.php]

Appendix

# Table 1. Conclusions of input session

| Based on the feedback from the FDs and pulmonologists in the input session regarding the main recommendations to be included in the algorithm, it was decided to: | Include post-bronchodilator spirometry to confirm suspected COPD |
| --- | --- |
| Consider other entities in the differential diagnosis before confirming a diagnosis of COPD |
| Classify and treat COPD based on dyspnea grade, number and severity of exacerbations, and/or hospital admissions in the past year |
| With a view to simplifying the content of the proposed algorithm, it was also agreed to: | Classify smoking history and personal history as separate risk factors and group all other factors under “Other risk factors”, as these can vary according to setting and physician criteria |
| Group together all entities that should be ruled out in the differential diagnosis before establishing a definitive diagnosis of COPD |
| Leave the decision on which diagnostic tests or procedures to perform in the differential diagnosis to the discretion of the physician |
| Not include recommendations on evaluating patient quality of life, as this is an implicit part of any patient evaluation |
| Recommend treatment with LABA or LAMA monotherapy (preferably LAMA) for patients with grade ≤2 dyspnea (with or without exacerbations) |
| Recommend dual therapy for patients with grade ≥1 dyspnea without exacerbations |
| Recommend dual therapy for patients with grade ≥1 dyspnea with exacerbations and include the possibility of adding inhaled corticosteroids if exacerbations persist despite dual bronchodilator therapy |
| Recommend a follow-up visit for patients newly diagnosed with COPD 1 month after starting treatment and every 4-6 months thereafter |
| Include the following recommendations for patients with newly diagnosed COPD: smoking cessation, instruction in correct inhaler use, avoidance of sedentary behavior, vaccination, reduction of exposure to risk factors, and weight control |
| Recommend clinical evaluation at each follow-up visit to assess improvement (first follow-up visit) or stability (subsequent follow-up visits), adherence to treatment, correct inhaler use, and possible comorbidities |
| Recommend re-evaluation of dyspnea, exacerbations, inhaler use, smoking cessation, and initial recommendations during follow-up visits |
| Exclude spirometry as an essential follow-up test and propose that this be done at the physician’s discretion |
| Recommend the following treatment changes for patients with unstable COPD: monotherapy to dual therapy, dual therapy to multiple therapy with referral to a pulmonologist, and direct referral to a pulmonologist for patients already on multiple therapy |
| Recommend a phenotype-oriented approach only when treating a patient with multiple therapy involving systemic drugs |
| Using the information collected in the previous phases of the project, including the input session, a small working group prepared the draft algorithm for the simplified diagnosis, treatment, and management of COPD in primary care (phase 3, Figure 1). The following changes were introduced: | The differential diagnosis step was included before the definitive diagnosis of COPD step and presented as an option rather than a necessary step in the diagnostic workup. |
| In the recommendations section, reduction in exposure to risk factors (e.g., air pollution, smoke from biomass fuel) was linked to smoking cessation. |
| Treatment options were structured into two pathways according to dyspnea grade (≤ 1 vs ≥ 2). |
| Emergency visits for dyspnea of probable respiratory origin were added to cough, expectoration, and dyspnea in the section on which symptoms should raise suspicion of COPD. |
| Personal history (referring to any personal event that can influence respiratory disease) was added to smoking history in the section on risk factors that should raise suspicion of COPD. |
| Asthma, α-1 antitrypsin deficiency, other respiratory diseases, anxiety, cardiovascular disease, and anemia were specified as the most common entities to contemplate in the differential diagnosis before establishing a definitive diagnosis of COPD. |
| In the recommendations section, type of vaccination was specified (influenza and pneumococcal) and the importance of demonstrating correct inhaler use highlighted. |
| In the follow-up visit section, it was specified that variations in dyspnea rather than presence of dyspnea should be evaluated, as dyspnea is always present to a greater or lesser extent in COPD. |
